# Supplementary material for: Identification of the evolutionarily conserved nuclear envelope proteins Lem2 and MicLem2 in Tetrahymena thermophila
Source: PubMed Central journal article supplement (PMC7285967; doi:10.1016/j.gene.2019.100006), 2019-01-22
Supplement: mmc2.pdf [file mmc2.pdf]

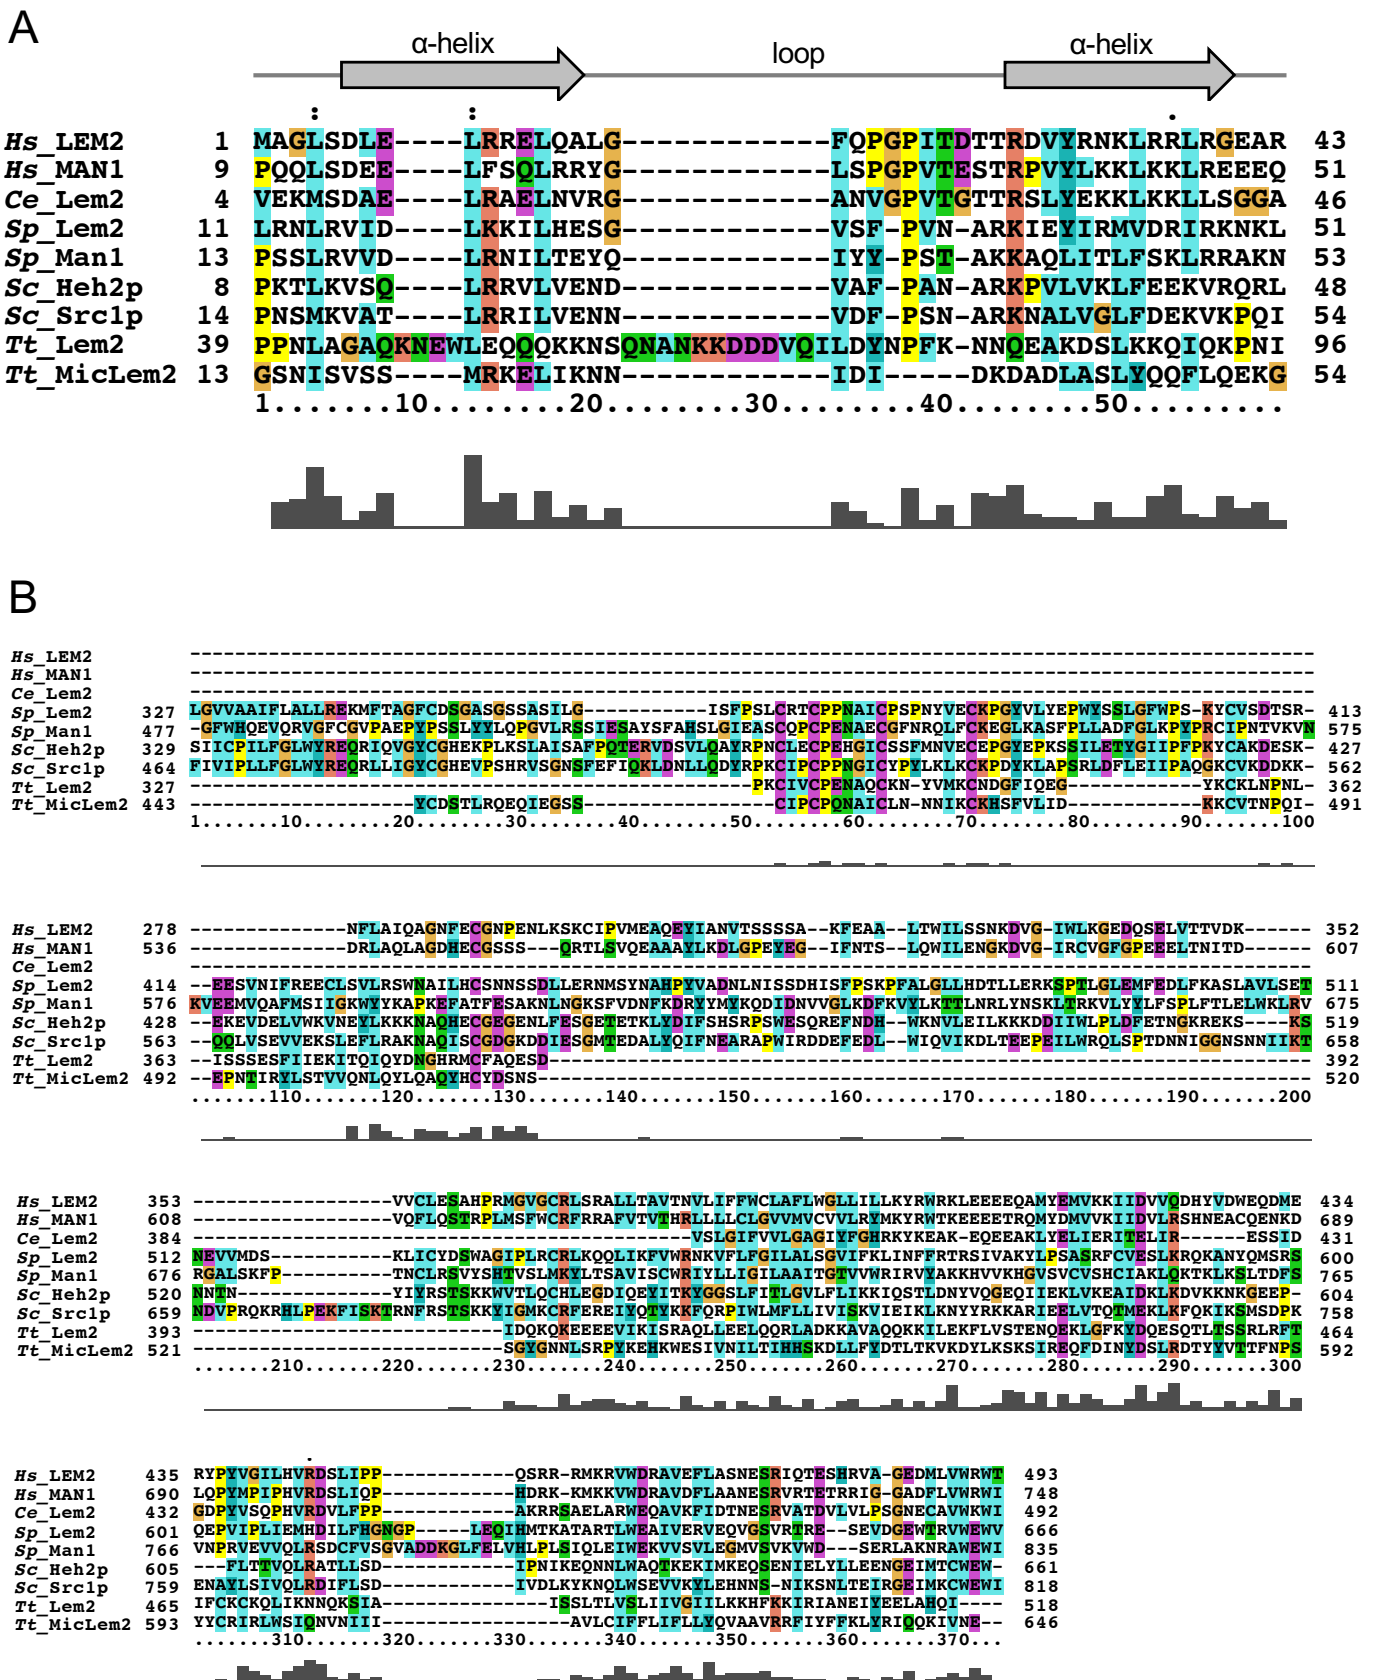

Supplementary Figure S1. Multiple sequence alignment of the LEM/HeH and the MSC domains. *Homo sapiens* (*Hs*) LEM2, *Hs* MAN1, *Caenorhabditis elegans* Lem2, *Schizosaccharomyces pombe* (*Sp*) Lem2, *Sp* Man1, *Saccharomyces cerevisiae* (*Sc*) Heh2p, *Sc* Src1p, *Tetrahymena thermophila* (*Tt*) Lem2, and *Tt* MicLem2 were aligned by ClustalX with all parameters set to default. A. Alignment of the LEM/HeH domain. B. Alignment of the MSC domain.
